# Supplementary material for: ZnO rods rooted on manifold carbon nanofiber paper as a scalable photocatalyst platform: the effects of ZnO morphology
Source: Royal Society of Chemistry journal article supplement (doi:10.1039/c6ra15931a), 2016-01-01
Supplement: c6ra15931a1.pdf [file c6ra15931a1.pdf]

## Supporting Information

ZnO rods rooted on manifold carbon nanofiber paper as scalable photocatalyst  
platform: *Effects of ZnO morphology*

Sung-Ho Hwang,<sup>a</sup> Young Kwang Kim,<sup>a</sup> Song Hyun Yoon,<sup>a</sup>

Sang Kyoo Lim,<sup>a,\*</sup> and Hyunwoong Park<sup>b,\*</sup>

<sup>a</sup>*Division of Nano & Energy Convergence Research, Daegu Gyeongbuk Institute of Science  
and Technology (DGIST), Daegu 42988, Republic of Korea*

<sup>b</sup>*School of Energy Engineering, Kyungpook National University, Daegu 41566, Republic of  
Korea*

\*To whom correspondence should be addressed:

(S.K. Lim) limsk@dgist.ac.kr; (H. Park) hwp@knu.ac.kr

**Table S1.** Adsorption of phenol in CNF/ZnO samples. The samples (~4.6 mg) were immersed in aqueous phenol solution (200  $\mu$ M; 50 mL) for 30 min prior to irradiation.

| Samples                          | CZ-a-0.25 | CZ-a-0.5 | CZ-0.25 | CZ-0.5 |
|----------------------------------|-----------|----------|---------|--------|
| Adsorption amount ( $\mu$ mol/g) | 53.2      | 51.5     | 54.9    | 54.5   |
| Adsorption capacity (%)          | 2.45      | 2.37     | 2.53    | 2.51   |

**Table S2.** Charge transfer resistance ( $R_{ct}$ ) of the samples.

| Samples               | CZ-a-0.25 | CZ-a-0.5 | CZ-0.25 | CZ-0.5 | NP    |
|-----------------------|-----------|----------|---------|--------|-------|
| $R_{ct}$ ( $\Omega$ ) | 57.07     | 81.83    | 143.1   | 113.9  | 278.1 |

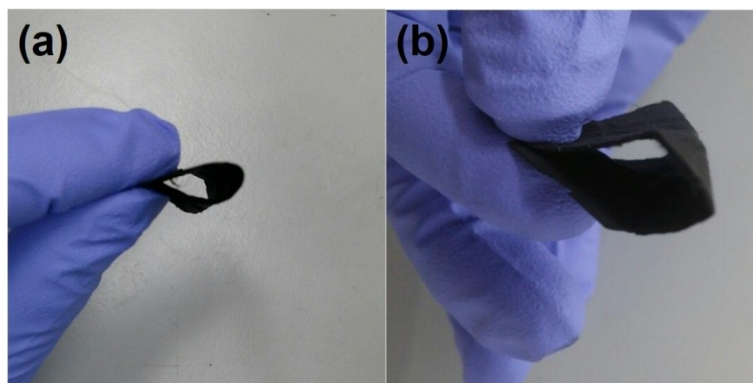

**Fig. S1.** Photographs of (a) an as-synthesized CNF film and (b) a CNF manifold film (fold five times). Both were annealed at 1400 °C.

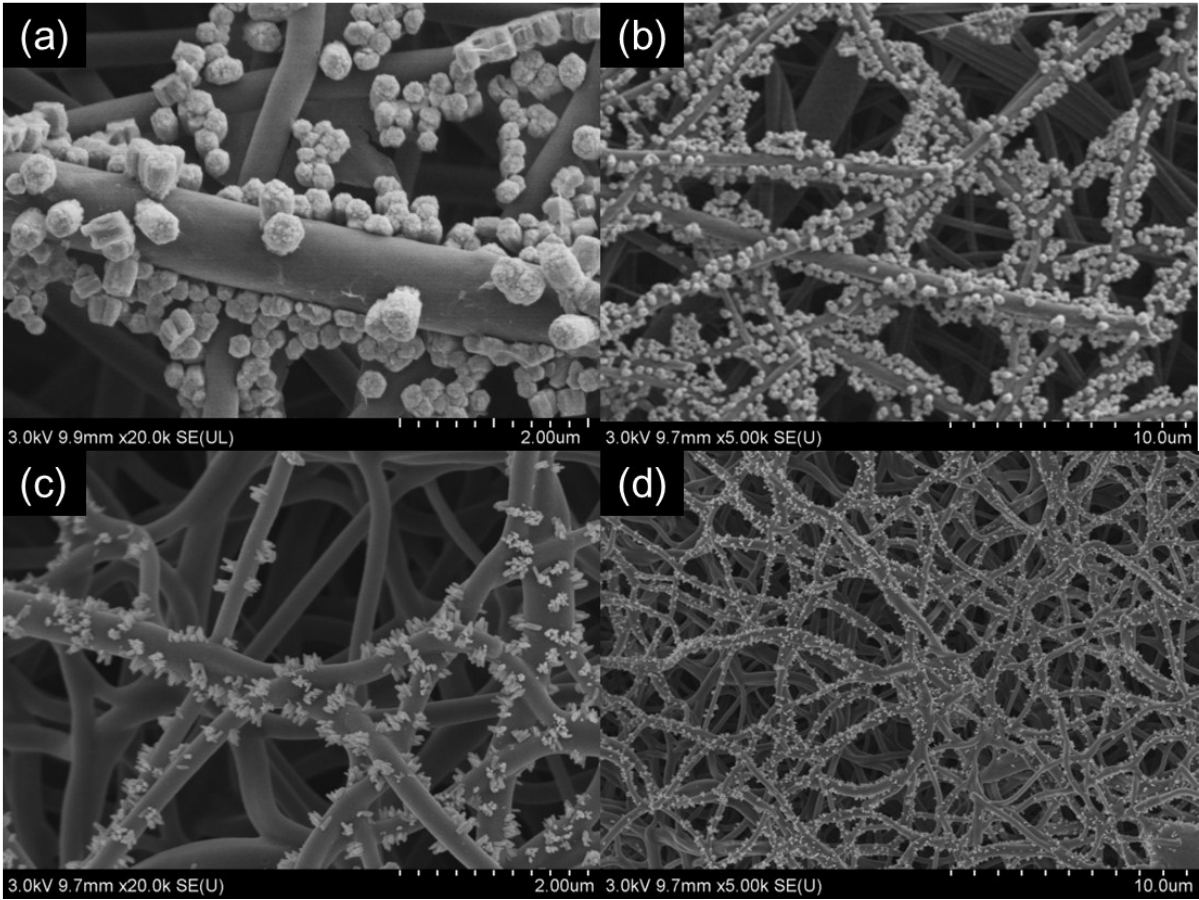

**Fig. S2.** SEM images of (a, b) CZ-0.5 and (c, d) CZ-0.25. They were synthesized via the electrodeposition of ZnO on carbon nanofibers-woven webs placed in the aqueous solutions of zinc acetate at 0.5 and 0.25 mM, respectively.

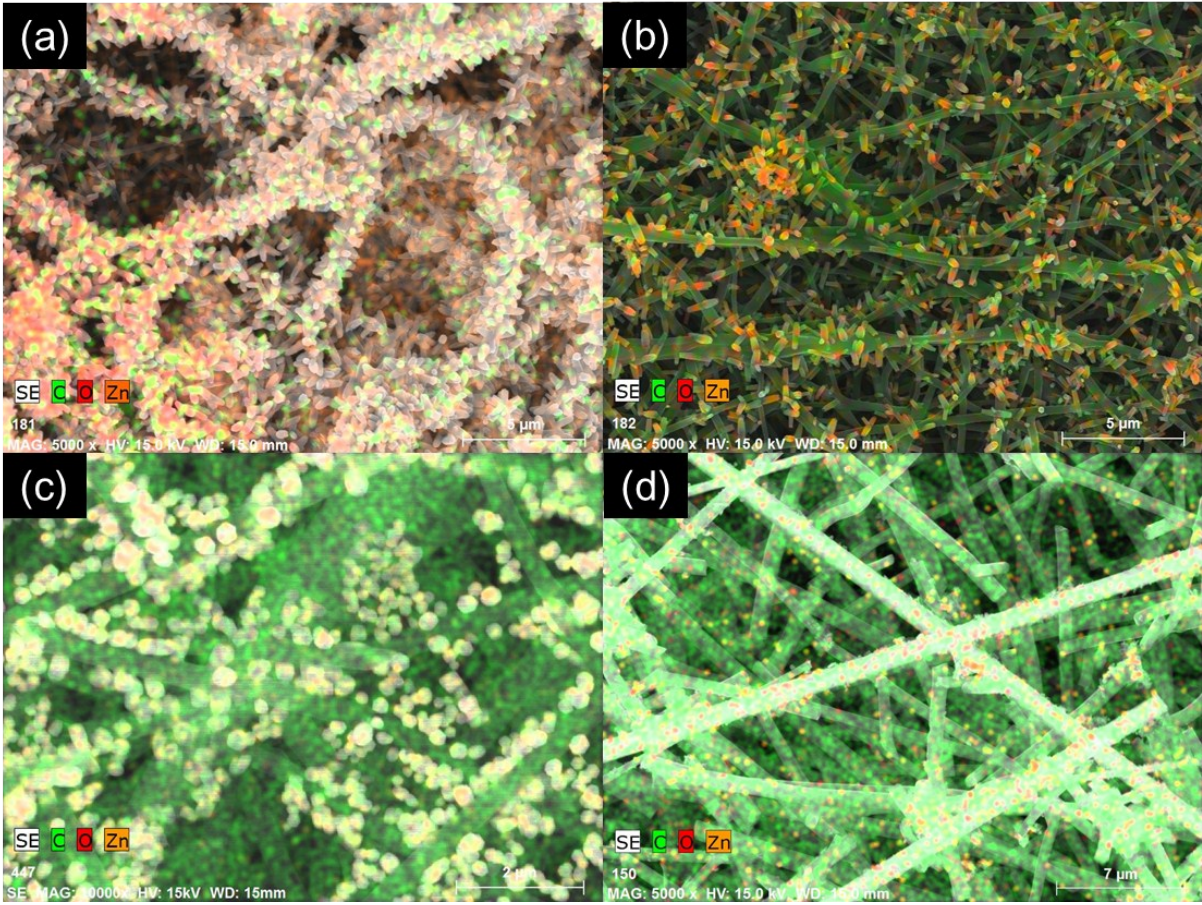

**Fig. S3.** EDX mapping of (a) CZ-a-0.5 and (b) CZ-a-0.25 (c) CZ-0.5 and (d) CZ-0.25.

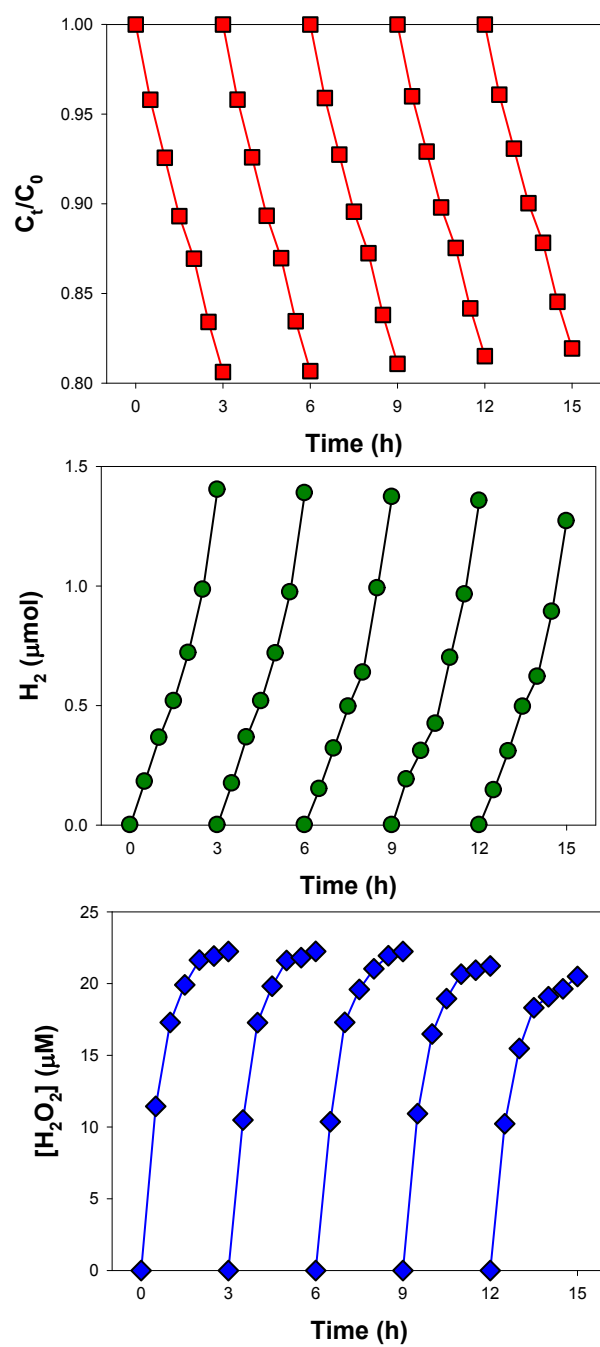

**Fig. S4.** Reusability tests of CZ-a-0.25 sample for phenol (PhOH, 200  $\mu\text{M}$ ) degradation, and  $H_2$  and  $H_2O_2$  productions.

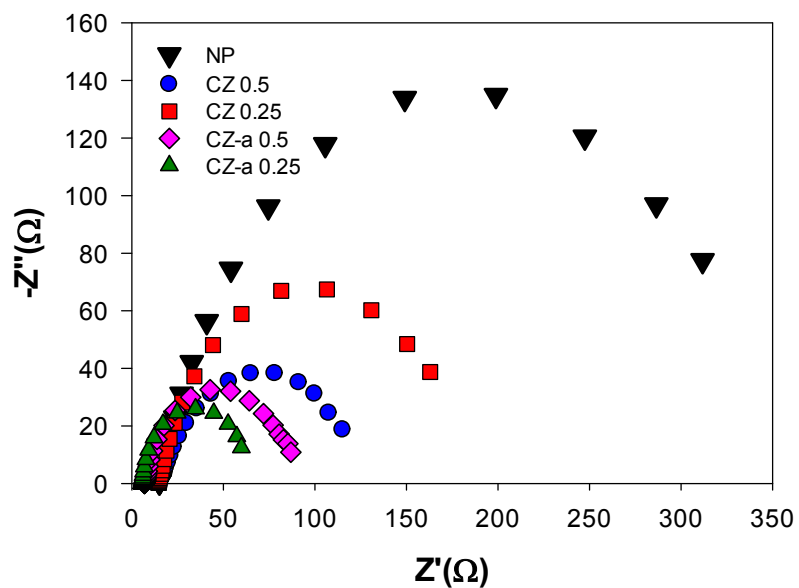

**Fig. S5.** EIS analysis of the samples. They were held at a bias potential of  $-0.2$  V vs. Ag/AgCl in 1 M KOH solution with a frequency range of 100 kHz to 0.1 Hz with an AC perturbation of 5 mV.

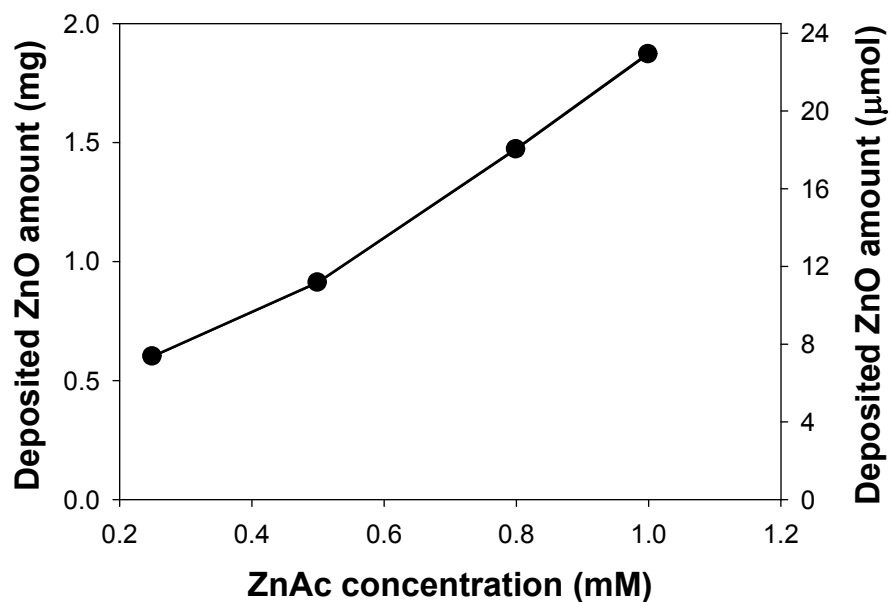

**Fig. S6.** Effect of ZnAc concentration on the amount of ZnO loaded in CNF.

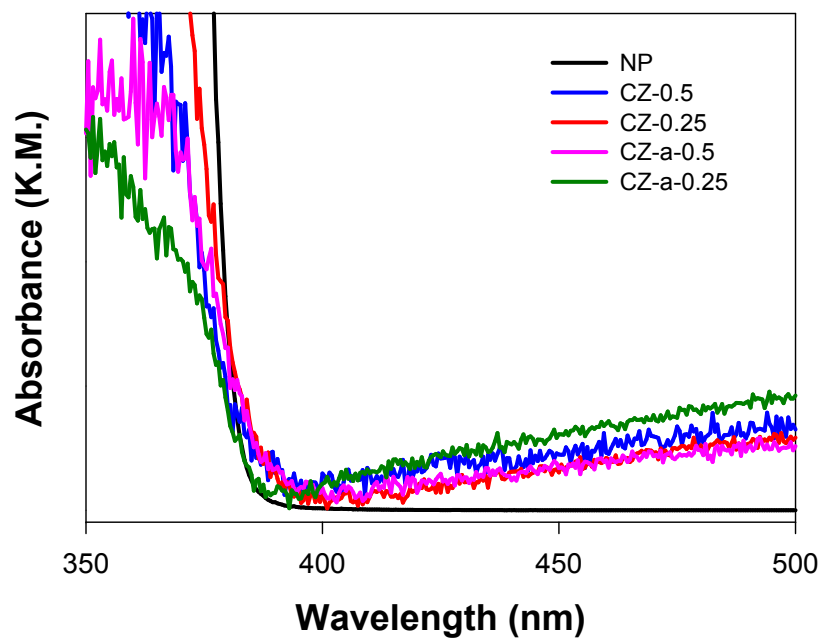

**Fig. S7.** UV-vis diffuse reflectance absorption spectra of samples. The absorbance was expressed as a Kubelka-Munk unit.

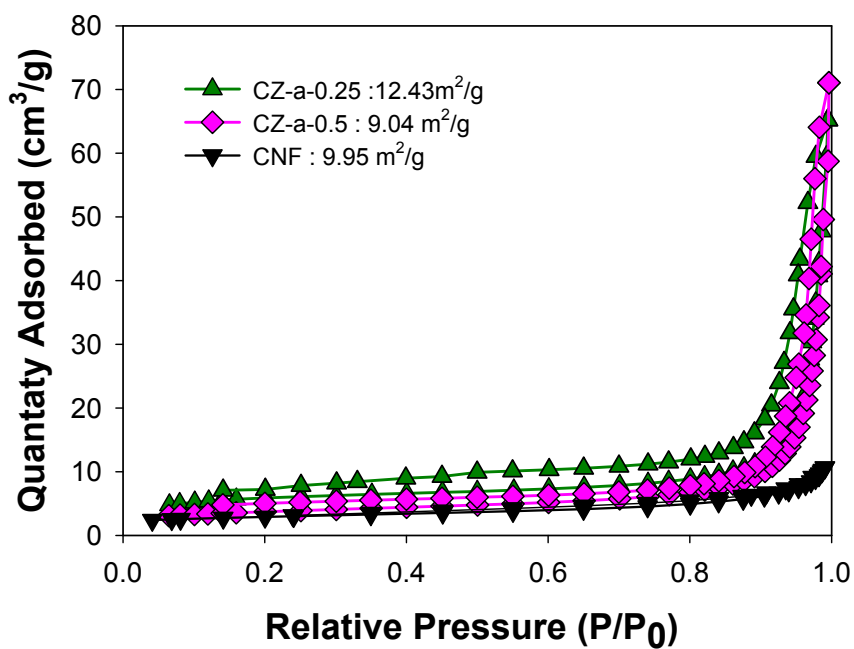

**Fig. S8.** N<sub>2</sub> adsorption-desorption BET isotherms of CZ-a-0.25, CZ-a-0.5, and CNF.
